# Supplementary material for: Late Neogene terrestrial climate reconstruction of the Central Namib Desert derived by the combination of U-Pb silcrete and TCN exposure dating
Source: Copernicus journal article supplement (doi:10.5194/gchron-2023-19), 2023-07-06

lower intercept =  $4.392 \text{ Ma} \pm 0.51 \mid 3.7\%$  (n=215)

$(^{207}\text{Pb}/^{206}\text{Pb})_c = 0.8491 \pm 0.31 \mid 2.2\%$

MSWD = 52,  $p(\chi^2) = 0$

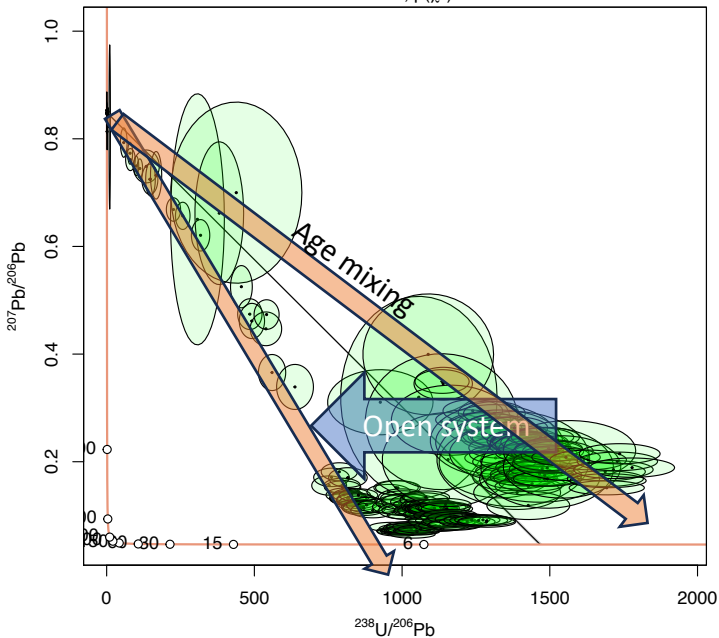

Supplement: Supplementary file [file gchron-2023-19-RC2-supplement.pdf]
